# Supplementary material for: Whole genome sequencing to identify predictive markers for the risk of drug-induced interstitial lung disease
Source: PLoS One. 2019 Oct 4;14(10):e0223371. doi: 10.1371/journal.pone.0223371 (PMC6777826; doi:10.1371/journal.pone.0223371)
Supplement: S1 Table — (XLSX) [file pone.0223371.s003.xlsx]

## Sheet: S1 Table
S1 Table. Association results of screening, replication, and combined studies for the 42 SNVs with P < 0.0001 in the screening study.
Chr.	SNP ID	Positiona	Gene	Allele (1/2)b	Location	Stage	Risk allele	Drug-induced ILD																EGFR-TKI-induced ILDd
								Case							Controlc						P value	Odds ratio [95% CI]		Case						P value	Odds ratio [95% CI]
								Allele			Allele Frequency		RAF		Allele			Allele Frequency		RAF				Allele			Allele Frequency		RAF
								1	2		1	2			1	2		1	2					1	2		1	2
6	rs148789520	25167266	Intergenic	C/T		Screening	T	48	4		0.923077	0.0769231	0.0769231		7029	11		0.998437	0.0015625	0.0015625	3.31 x 10-6	52.99 [11.89-185.91]		23	3		0.884615	0.115385	0.115385	1.57 x 10-5	83.35 [21.81-318.51]
						Replication		36	0		1	0	0								1	0
						Combined		84	4		0.954545	0.0454545	0.0454545								2.67 x 10-5	30.43 [9.50-97.49]
9	rs34447339	99247274	HABP4	C/T	Intron	Screening	T	41	11		0.788462	0.211538	0.211538		6778	322		0.954648	0.0453521	0.0453521	2.05 x 10-5	5.64 [2.59-11.31]		22	4		0.846154	0.153846	0.153846	2.90 x 10-2	3.83 [1.31-11.17]
						Replication		36	0		1	0	0								4.09 x 10-1	0
						Combined		77	11		0.875	0.125	0.125								2.33 x 10-3	3.01 [1.58-5.71]
9	rs7858287	99204516	Intergenic	A/C		Screening	C	41	11		0.788462	0.211538	0.211538		6731	321		0.954481	0.045519	0.045519	2.12 x 10-5	5.63 [2.86-11.05]		17	3		0.85	0.15	0.153846	6.10 x 10-2	3.70 [1.08-12.69]
						Replication		36	0		1	0	0								4.10 x 10-1	0
						Combined		77	11		0.875	0.125	0.125								2.40 x 10-3	3.00 [1.58-5.69]
11	rs11217593	119822294	Intergenic	G/A		Screening	G	51	1		0.980769	0.0192308	0.980769		5376	1718		0.757824	0.242176	0.757824	2.24 x 10-5	16.30 [2.25-118.02]		25	1		0.961538	0.0384615	0.961538	1.07 x 10-2	7.99 [1.08-59.00]
						Replication		29	7		0.805556	0.194444	0.805556								6.96 x 10-1	1.32 [0.58-3.03]
						Combined		80	8		0.909091	0.0909091	0.909091								5.84 x 10-4	3.20 [1.54-6.62]
9	rs34304649	99247301	HABP4	T/A	Intron	Screening	A	41	11		0.788462	0.211538	0.211538		6774	326		0.954085	0.0459155	0.0459155	2.29 x 10-5	5.57 [2.56-11.17]		22	4		0.846154	0.153846	0.153846	3.01 x 10-2	3.78 [1.29-11.03]
						Replication		36	0		1	0	0								4.11 x 10-1	0
						Combined		77	11		0.875	0.125	0.125								2.56 x 10-3	2.97 [1.56-5.64]
9	rs10761013	99201939	Intergenic	T/C		Screening	C	41	11		0.788462	0.211538	0.211538		6773	327		0.953944	0.0460563	0.0460563	2.36 x 10-5	5.55 [2.55-11.13]		22	4		0.846154	0.153846	0.153846	3.04 x 10-2	3.77 [1.29-10.99]
						Replication		36	0		1	0	0								4.11 x 10-1	0
						Combined		77	11		0.875	0.125	0.125								2.62 x 10-3	2.96 [1.56-5.62]
9	rs10991352	99249548	HABP4	A/T	Intron	Screening	T	41	11		0.788462	0.211538	0.211538		6776	328		0.953829	0.0461712	0.0461712	2.41 x 10-5	5.54 [2.54-11.10]		22	4		0.846154	0.153846	0.153846	3.07 x 10-2	3.76 [1.29-10.96]
						Replication		36	0		1	0	0								4.11 x 10-1	0
						Combined		77	11		0.875	0.125	0.125								2.67 x 10-3	2.95 [1.55-5.60]
16	rs9935079	1231987	CACNA1H	G/A	Intron	Screening	G	33	19		0.634615	0.365385	0.634615		2303	4415		0.34281	0.65719	0.34281	2.44 x 10-5	3.33 [1.89-5.87]		16	10		0.615385	0.384615	0.615385	5.95 x 10-3	3.07 [1.39-6.77]
						Replication		15	21		0.416667	0.583333	0.416667								3.80 x 10-1	1.37 [0.70-2.66]
						Combined		48	40		0.545455	0.454545	0.545455								1.59 x 10-4	2.30 [1.51-3.51]
9	rs10820634	99215104	HABP4	T/C	Intron	Screening	C	41	11		0.788462	0.211538	0.211538		6695	325		0.953704	0.0462963	0.0462963	2.47 x 10-5	5.53 [2.81-10.85]		22	4		0.846154	0.153846	0.153846	3.10 x 10-2	3.75 [1.28-10.93]
						Replication		36	0		1	0	0								4.12 x 10-1	0
						Combined		77	11		0.875	0.125	0.125								2.73 x 10-3	2.94 [1.55-5.59]
9	rs10991346	99247758	HABP4	C/T	Intron	Screening	T	41	11		0.788462	0.211538	0.211538		6478	316		0.953488	0.0465116	0.0465116	2.59 x 10-5	5.50 [2.80-10.80]		22	4		0.846154	0.153846	0.153846	3.14 x 10-2	3.73 [1.28-10.88]
						Replication		36	0		1	0	0								4.12 x 10-1	0
						Combined		77	11		0.875	0.125	0.125								2.83 x 10-3	2.93 [1.54-5.56]
22	rs35198919	50034703	C22orf34	T/C	Intron	Screening	C	41	11		0.788462	0.211538	0.211538		6725	333		0.952819	0.0471805	0.0471805	2.93 x 10-5	5.42 [2.76-10.64]		18	8		0.692308	0.307692	0.307692	1.93 x 10-5	8.98 [3.87-20.79]
						Replication		32	4		0.888889	0.111111	0.111111								8.94 x 10-2	2.52 [0.89-7.18]
						Combined		73	15		0.829545	0.170455	0.170455								1.87x 10-5	4.15 [2.36-7.31]
5	rs417168	135216860	SLC25A48	T/C	Intron	Screening	C	49	3		0.942308	0.0576923	0.0576923		7086	6		0.999154	0.000846024	0.000846024	2.96 x 10-5	71.85 [11.31-347.36]		23	3		0.884615	0.115385	0.115385	3.58 x 10-6	154.04 [36.31-653.49]
						Replication		36	0		1	0	0								1	0
						Combined		85	3		0.965909	0.0340909	0.0340909								1.42 x 10-4	41.68 [10.26-169.42]
5	rs442281	135216861	SLC25A48	G/A	Intron	Screening	A	49	3		0.942308	0.0576923	0.0576923		7086	6		0.999154	0.000846024	0.000846024	2.96 x 10-5	72.31 [17.58-297.38]		23	3		0.884615	0.115385	0.115385	3.58 x 10-6	154.04 [36.31-653.49]
						Replication		36	0		1	0	0								1	0
						Combined		85	3		0.965909	0.0340909	0.0340909								1.42 x 10-4	41.68 [10.26-169.42]
9	rs7030316	99250463	HABP4	C/T	Exon (L364L)	Screening	T	41	11		0.788462	0.211538	0.211538		6755	335		0.95275	0.0472496	0.0472496	2.97 x 10-5	5.41 [2.76-10.62]		22	4		0.846154	0.153846	0.153846	3.30 x 10-2	3.67 [1.26-10.70]
						Replication		36	0		1	0	0								4.14 x 10-1	0
						Combined		77	11		0.875	0.125	0.125								3.18 x 10-3	2.88 [1.52-5.47]
5	rs7735008	29270145	Intergenic	A/G		Screening	G	11	41		0.211538	0.788462	0.788462		3551	3547		0.500282	0.499718	0.499718	3.39 x 10-5	3.73 [1.91-7.27]		6	20		0.230769	0.769231	0.769231	9.23 x 10-3	3.34 [1.34-8.32]
						Replication		21	15		0.583333	0.416667	0.416667								4.04 x 10-1	0.72 [0.37-1.39]
						Combined		32	56		0.363636	0.636364	0.636364								1.32 x 10-2	1.75 [1.13-2.71]
12	rs117358859	6571715	VAMP1	G/A	3'UTR	Screening	A	48	4		0.923077	0.0769231	0.0769231		6904	22		0.996824	0.00317644	0.00317644	3.63 x 10-5	26.15 [8.68-78.76]		23	3		0.884615	0.115385	0.115385	1.01 x 10-4	40.93 [11.45-146.32]
						Replication		36	0		1	0	0								1	0
						Combined		84	4		0.954545	0.0454545	0.0454545								2.80 x 10-4	14.94 [5.04-44.31]
17	rs72839606	51663791	Intergenic	C/T		Screening	T	28	24		0.538462	0.461538	0.461538		5644	1456		0.79	0.21	0.21	3.75 x 10-5	3.32 [1.92-5.75]		15	11		0.576923	0.423077	0.423077	1.22 x 10-2	2.84 [1.30-6.20]
						Replication		29	7		0.805556	0.194444	0.194444								1	0.94 [0.41-2.14]
						Combined		57	31		0.647727	0.352273	0.352273								1.35 x 10-3	2.11 [1.36-3.28]
5	rs75399069	24664646	Intergenic	A/C		Screening	C	44	8		0.846154	0.153846	0.153846		6921	171		0.975888	0.0241117	0.0241117	3.90 x 10-5	7.36 [3.41-15.87]		19	7		0.730769	0.269231	0.269231	2.39 x 10-6	14.91 [6.19-35.94]
						Replication		36	0		1	0	0								1	0
						Combined		80	8		0.909091	0.0909091	0.0909091								1.50 x 10-3	4.05 [1.93-8.50]
9	rs79914619	99140778	SLC35D2	A/G	Intron	Screening	G	43	9		0.826923	0.173077	0.173077		6875	225		0.96831	0.0316901	0.0316901	3.97 x 10-5	6.40 [3.08-13.28]		22	4		0.846154	0.153846	0.153846	8.90 x 10-3	5.56 [1.90-16.25]
						Replication		36	0		1	0	0								6.29 x 10-1	0
						Combined		79	9		0.897727	0.102273	0.102273								2.14 x 10-3	3.48 [1.72-7.03]
6	rs75355928	6127181	Intergenic	G/A		Screening	A	49	3		0.942308	0.0576923	0.0576923		7077	7		0.999012	0.000988142	0.000988142	4.23 x 10-5	61.90 [15.55-246.38]		24	2		0.923077	0.0769231	0.0769231	4.56 x 10-4	84.25 [16.64-426.47]
						Replication		36	0		1	0	0								1	0
						Combined		85	3		0.965909	0.0340909	0.0340909								2.01 x 10-4	35.68 [9.07-140.33]
11	rs198438	61476450	DAGLA	G/A	Intron	Screening	A	20	32		0.384615	0.615385	0.615385		4644	2324		0.666475	0.333525	0.333525	4.31 x 10-5	3.20 [1.82-5.60]		11	15		0.423077	0.576923	0.576923	1.18x 10-2	2.72 [1.25-5.94]
						Replication		24	12		0.666667	0.333333	0.333333								1	1.00 [0.50-2.00]
						Combined		44	44		0.5	0.5	0.5								1.39 x 10-3	2.00 [1.31-3.04]
2	rs10165147	154697039	Intergenic	C/G		Screening	G	26	26		0.5	0.5	0.5		5412	1686		0.762468	0.237532	0.237532	4.94 x 10-5	3.21 [1.86-5.54]		9	17		0.346154	0.653846	0.653846	8.22 x 10-6	6.06 [2.70-13.63]
						Replication		25	11		0.694444	0.305556	0.305556								3.30 x 10-1	1.41 [0.69-2.88]
						Combined		51	37		0.579545	0.420455	0.420455								2.10 x 10-4	2.33 [1.52-3.57]
2	rs77215085	58108485	Intergenic	C/T		Screening	T	43	9		0.826923	0.173077	0.173077		6874	232		0.967352	0.0326485	0.0326485	4.97 x 10-5	6.20 [2.99-12.87]		22	4		0.846154	0.153846	0.153846	9.85 x 10-3	5.39 [1.84-15.76]
						Replication		35	1		0.972222	0.0277778	0.0277778								1	0.85 [0.12-6.21]
						Combined		78	10		0.886364	0.113636	0.113636								6.93 x 10-4	3.80 [1.94-7.43]
12	rs190311236	13703158	GRIN2B	A/G	3'UTR	Screening	G	45	7		0.865385	0.134615	0.134615		6975	129		0.981841	0.0181588	0.0181588	5.03 x 10-5	8.41 [3.72-19.00]		23	3		0.884615	0.115385	0.115385	1.18 x 10-2	7.05 [2.09-23.79]
						Replication		35	1		0.972222	0.0277778	0.0277778								4.85 x 10-1	1.54 [0.21-11.36]
						Combined		80	8		0.909091	0.0909091	0.0909091								2.52 x 10-4	5.41 [2.56-11.42]
12	rs117836679	6571716	VAMP1	G/A	3'UTR	Screening	A	48	4		0.923077	0.0769231	0.0769231		6897	25		0.996388	0.00361167	0.00361167	5.69 x 10-5	23.00 [7.71-68.58]		23	3		0.884615	0.115385	0.115385	1.43 x 10-4	35.98 [10.15-127.57]
						Replication		36	0		1	0	0								1	0
						Combined		84	4		0.954545	0.0454545	0.0454545								4.33 x 10-4	13.14 [4.47-38.58]
11	rs879486	61475233	DAGLA	T/C	Intron	Screening	T	33	19		0.634615	0.365385	0.634615		2340	4250		0.355083	0.644917	0.355083	5.72 x 10-5	3.15 [1.79-5.56]		16	10		0.615385	0.384615	0.615385	7.39 x 10-3	2.91 [1.32-6.41]
						Replication		12	22		0.352941	0.647059	0.352941								1	0.99 [0.49-2.01]
						Combined		45	41		0.523256	0.476744	0.523256								2.03 x 10-3	1.99 [1.30-3.05]
2	rs6712169	236244894	Intergenic	G/T		Screening	T	33	19		0.634615	0.365385	0.365385		6096	1012		0.857625	0.142375	0.142375	5.87 x 10-5	3.47 [1.96-6.12]		17	9		0.653846	0.346154	0.346154	7.70 x 10-3	3.19 [1.42-7.17]
						Replication		32	4		0.888889	0.111111	0.111111								8.11 x 10-1	0.75 [0.27-2.13]
						Combined		65	23		0.738636	0.261364	0.261364								3.28 x 10-3	2.13 [1.32-3.45]
10	rs34008051	34010545	Intergenic	C/T		Screening	T	33	19		0.634615	0.365385	0.365385		6095	1013		0.857485	0.142515	0.142515	5.95 x 10-5	3.46 [1.96-6.12]		17	9		0.653846	0.346154	0.346154	7.75 x 10-3	3.19 [1.42-7.17]
						Replication		32	4		0.888889	0.111111	0.111111								8.11 x 10-1	0.75 [0.27-2.13]
						Combined		65	23		0.738636	0.261364	0.261364								3.31 x 10-3	2.13 [1.32-3.44]
2	rs55656215	236253788	Intergenic	T/C		Screening	C	33	19		0.634615	0.365385	0.365385		6089	1015		0.857123	0.142877	0.142877	6.16 x 10-5	3.45 [1.96-6.10]		17	9		0.653846	0.346154	0.346154	7.88 x 10-3	3.18 [1.41-7.14]
						Replication		32	4		0.888889	0.111111	0.111111								8.11 x 10-1	0.75 [0.26-2.12]
						Combined		65	23		0.738636	0.261364	0.261364								3.37 x 10-3	2.12 [1.31-3.43]
11	rs80110153	119850854	Intergenic	T/C		Screening	T	51	1		0.980769	0.0192308	0.980769		5513	1577		0.777574	0.222426	0.777574	6.44 x 10-5	14.59 [2.01-105.65]		25	1		0.961538	0.0384615	0.961538	1.80 x 10-2	7.15 [0.97-52.82]
						Replication		30	6		0.833333	0.166667	0.833333								5.47 x 10-1	1.43 [0.59-3.44]
						Combined		81	7		0.920455	0.0795455	0.920455								6.59 x 10-4	3.31 [1.53-7.18]
20	rs6040800	11605308	Intergenic	A/T		Screening	A	51	1		0.980769	0.0192308	0.980769		5515	1591		0.776105	0.223895	0.776105	6.52 x 10-5	14.71 [2.03-106.55]		25	1		0.961538	0.0384615	0.961538	1.78 x 10-2	7.21 [0.98-53.27]
						Replication		31	5		0.861111	0.138889	0.861111								3.15 x 10-1	1.79 [0.69-4.61]
						Combined		82	6		0.931818	0.0681818	0.931818								1.48 x 10-4	3.94 [1.72-9.05]
8	rs138525367	77217130	Intergenic	C/T		Screening	T	46	6		0.884615	0.115385	0.115385		6977	91		0.987125	0.0128749	0.0128749	6.72 x 10-5	10.00 [4.17-24.00]		24	2		0.923077	0.0769231	0.0769231	4.51 x 10-2	6.39 [1.49-27.44]
						Replication		35	1		0.972222	0.0277778	0.0277778								3.75 x 10-1	2.19 [0.30-16.16]
						Combined		81	7		0.920455	0.0795455	0.0795455								1.87 x 10-4	6.63 [2.98-14.74]
4	rs116915375	91302822	CCSER1	G/A	Intron	Screening	A	43	9		0.826923	0.173077	0.173077	6836		242		0.96581	0.0341904	0.0341904	7.03 x 10-5	5.91 [2.85-12.27]		23	3		0.884615	0.115385	0.115385	5.88 x 10-2	3.68 [1.10-12.36]
						Replication		35	1		0.972222	0.0277778	0.0277778								1	0.81 [0.11-5.92]
						Combined		78	10		0.886364	0.113636	0.113636								9.76 x 10-4	3.62 [1.85-7.08]
5	rs7706299	29342140	Intergenic	A/C		Screening	C	11	41		0.211538	0.788462	0.788462		3417	3665		0.482491	0.517509	0.517509	7.28 x 10-5	3.48 [1.78-6.77]		5	21		0.192308	0.807692	0.807692	2.88 x 10-3	3.92 [1.47-10.40]
						Replication		21	15		0.583333	0.416667	0.416667								2.45 x 10-1	0.67 [0.34-1.29]
						Combined		32	56		0.363636	0.636364	0.636364								3.13 x 10-2	1.63 [1.05-2.53]
8	rs190245055	11335059	Intergenic	G/A		Screening	A	49	3		0.942308	0.0576923	0.0576923		7075	9		0.99873	0.00127047	0.00127047	7.67 x 10-5	48.13 [12.65-183.17]		24	2		0.923077	0.0769231	0.0769231	6.93 x 10-4	65.51 [13.44-319.23]
						Replication		36	0		1	0	0								1	0
						Combined		85	3		0.965909	0.0340909	0.0340909								3.63 x 10-4	27.75 [7.38-104.28]
2	rs572879899	35153357	AC012593.1	C/T	Intron	Screening	T	47	5		0.903846	0.0961538	0.0961538		7038	58		0.991826	0.00817362	0.00817362	8.55 x 10-5	12.91 [4.96-33.63]		23	3		0.884615	0.115385	0.115385	1.35 x 10-3	15.83 [4.62-54.18]
						Replication		36	0		1	0	0								1	0
						Combined		83	5		0.943182	0.0568182	0.0568182								9.89 x 10-4	7.31 [2.86-18.69]
4	rs79066625	1402525	Intergenic	C/T		Screening	T	35	17		0.673077	0.326923	0.326923		6050	830		0.87936	0.12064	0.12064	8.73 x 10-5	3.54 [1.97-6.35]		17	9		0.653846	0.346154	0.346154	2.52 x 10-3	3.86 [1.71-8.69]
						Replication		34	2		0.944444	0.0555556	0.0555556								3.09 x 10-1	0.43 [0.10-1.79]
						Combined		69	19		0.784091	0.215909	0.215909								1.25 x 10-2	2.01 [1.20-3.35]
8	rs187193782	143357443	TSNARE1	G/A	Intron	Screening	A	48	4		0.923077	0.0769231	0.0769231		7027	29		0.99589	0.00410998	0.00410998	8.91 x 10-5	20.19 [6.84-59.65]		23	3		0.884615	0.115385	0.115385	2.03 x 10-4	31.61 [8.99-111.11]
						Replication		36	0		1	0	0								1	0
						Combined		84	4		0.954545	0.0454545	0.0454545								6.70 x 10-4	11.54 [3.97-33.55]
11	rs198453	61464550	DAGLA	C/T	Intron	Screening	T	20	32		0.384615	0.615385	0.615385		4565	2351		0.660064	0.339936	0.339936	8.91 x 10-5	3.11 [1.77-5.44]		11	15		0.423077	0.576923	0.576923	2.03 x 10-2	2.65 [1.21-5.77]
						Replication		24	12		0.666667	0.333333	0.333333								1	0.97 [0.48-1.94]
						Combined		44	44		0.5	0.5	0.5								2.17 x 10-3	1.94 [1.27-2.96]
20	rs12625311	51836793	TSHZ2	T/C	Intron	Screening	C	21	31		0.403846	0.596154	0.596154		4755	2349		0.669341	0.330659	0.330659	9.59 x 10-5	2.99 [1.71-5.21]		10	16		0.384615	0.615385	0.615385	3.14 x 10-3	3.24 [1.47-7.15]
						Replication		19	17		0.527778	0.472222	0.472222								7.75 x 10-2	1.81 [0.94-3.49]
						Combined		40	48		0.454545	0.545455	0.545455								5.16 x 10-5	2.43 [1.59-3.71]
21	rs142884164	43778468	Intergenic	G/T		Screening	T	45	7		0.865385	0.134615	0.134615		6907	143		0.979716	0.0202837	0.0202837	9.83 x 10-5	7.51 [3.33-16.95]		23	3		0.884615	0.115385	0.115385	1.58 x 10-2	6.30 [1.87-21.22]
						Replication		35	1		0.972222	0.0277778	0.0277778								5.23 x 10-1	1.38 [0.19-10.14]
						Combined		80	8		0.909091	0.0909091	0.0909091								5.12 x 10-4	4.83 [2.29-10.18]
11	rs118093188	134286195	Intergenic	A/G		Screening	G	44	8		0.846154	0.153846	0.153846		6886	196		0.972324	0.0276758	0.0276758	9.94 x 10-5	6.39 [2.97-13.75]		21	5		0.807692	0.192308	0.192308	6.97 x 10-4	8.36 [3.12-22.41]
						Replication		36	0		1	0	0								6.26 x 10-1	0
						Combined		80	8		0.909091	0.0909091	0.0909091								3.42 x 10-3	3.51 [1.68-7.37]
Chr., chromosome; RAF, risk allele frequency; CI, confidence interval.
a Based on GRCh37 genome assembly.
b Reference allele (GRCh37) was defined as allele 1.
c The same controls were used in screening, replication, and combined studies.
d Subgroup analysis for EGFR-TKI-induced ILD.
